1 **“I wanted to be a responsible public health professional”: applying**  
2 **serious games for deep learning in global health courses**

3

4 Julia Smith,<sup>1\*</sup> Ellie Gooderham<sup>2</sup> and Julianne Piper<sup>3</sup>

5

6 <sup>1,2,3</sup> Faculty of Health Sciences, Simon Fraser University, Canada

7 \* corresponding author: [jhs6@sfu.ca](mailto:jhs6@sfu.ca) / 01 604 837 4285

8

9 Contributions: all authors contributed to data collection and analysis and conceptualization of  
10 the paper; JS wrote the first draft with EG and JP providing input into subsequent drafts

11

12

13 **ABSTRACT**

14 Serious games, including simulations, are increasingly used in university teaching, including  
15 medical and humanitarian studies as well as political science and international relations. There  
16 is less evidence of application in global health pedagogy. This article reports and reflects on the  
17 application of a simulation of negotiations around a global pandemic treaty in a Master of Public  
18 Health class on Global Health and International Affairs. Through participant observation and  
19 thematic analysis of students' reflective essays we find that the simulation enabled deep  
20 learning in line with the assignment objectives (to apply learning from past health crisis, engage  
21 with key concepts, and experience global health cooperation and challenges), as well as  
22 prompted critical reflections on moral dilemmas related to global health cooperation and  
23 decolonizing global health. The simulation provided an opportunity for students to engage with  
24 the wicked problems embedded within global health by drawing on multiple perspectives and  
25 approaches. While the students failed in negotiating a successful pandemic treaty, it was these  
26 failures that provided opportunities for deep learning and critical reflection as they questioned  
27 constraints on their underlying motivations and actions. This experience suggests simulations  
28 can serve as a particularly apt approach for teaching interdisciplinary approaches to global  
29 health as they enable to students to apply different sets of knowledge to a particular problem,  
30 explore unfamiliar concepts and critically asses their assumptions.

31

## 32 INTRODUCTION

33 Serious games, defined as games that aim to promote better human understanding and  
34 decision-making with respect to a particular phenomenon, developed out of the tradition of war  
35 games, used by militaries to test new tactics and teams.(1) Serious games – which include  
36 simulations– are now used in humanitarian and other sectors to create a safe-to-fail  
37 environment within which individuals can actively engage with situations they may encounter in  
38 the field. Increasingly, serious games are also used in university teaching, particularly in the  
39 fields of political science and international relations (IR). Evidence from these applications  
40 document positive pedagogical effects of serious games including the development of  
41 communication skills, teamwork, and critical thinking.(2–4) In particular, serious games have  
42 proven apt at “bringing complex theory to life” by providing students with the opportunity to  
43 experiment and grapple with operationalizing abstract concepts.(5)(6) Multiple evaluations  
44 emphasise that simulations promote active learning and encourage students’ to consider  
45 wicked problems from multiple perspectives.(7)

46 This article aims to add to the evidence on serious games in global health pedagogy by  
47 reporting on the application of a simulation of negotiations around a global pandemic treaty in a  
48 Master of Public Health class on Global Health and International Affairs. We first ask if the  
49 simulation met its stated learning objectives and then, through further analysis of student  
50 reflective essays and participant observations, explore additional pedagogic outcomes. We  
51 situate this analysis within existing scholarship on pedagogy of serious games for teaching and  
52 learning, before setting out the design and gameplay of the simulation - Accord. The discussion  
53 which follows then offers an analysis of student reflections and outcomes of the simulation for  
54 interdisciplinary, applied graduate learning.

55 The most common simulation in university political science or IR courses is the Model  
56 United Nations (Model UN) exercise. Students take on the role of member state diplomats and

57 try to achieve global cooperation around specific challenges. In addition to Model UN, IR and  
58 political science simulations can focus on peacekeeping missions, the processes of other  
59 international organizations (such as NATO, the ICJ), or humanitarian relief operations. Model  
60 UN and related simulations offers opportunities for deep learning (defined broadly as developing  
61 the ability to examine new ideas critically, tying them to existing concepts and ‘real world  
62 examples’ while making numerous links between ideas) particularly through the required  
63 application of theoretical and abstract concepts.(3) For example, through a simulation of a  
64 zombie apocalypse, Horn et al. found not only did most students improve their comprehension  
65 of core IR concepts, but that the greatest improvements were observed among the weakest  
66 students.(6) These findings reaffirmed previous studies which demonstrated that simulations  
67 provide an alternative, potentially more effective, learning modality for students whose  
68 education may not be as well facilitated by traditional classroom structures.

69 As a classroom teaching tool, simulations offer alternatives to teacher-centric methods by  
70 incorporating problem-based or experiential approaches that enable self-guided learning and  
71 the direct application of students’ knowledge.(8) Students engaged in intensive simulation  
72 exercises can gain deep learning, as they are confronted with moral dilemmas, competing  
73 arguments and solutions, and the broader question of what purposes knowledge serves.  
74 Newmann and Twigg argue that “the simulation format provides students a better framework  
75 than do lecture notes for long term retention of important international relations concepts.”(9)  
76 Kraine and Shadel find that students who participated in a simulation around world hunger  
77 demonstrated a greater degree of knowledge acquisition than students who learned the same  
78 material in a traditional classroom format. (10)

79 In addition to IR and political science, both humanitarian response and medical training  
80 frequently include simulations in their curriculum. These simulations tend to be focused on  
81 specific incidents and aimed at testing students’ knowledge, developing their ability to apply  
82 learning under pressure, and engage with unknowns. Simulations related to humanitarian relief

83 allow participants to assess their career alignment with the sector, and increase participants'  
84 understandings of the experiences of emergency situations and aid workers.(11) Medical  
85 training uses simulations to enable students to put learning into practice. Aiming to go beyond  
86 testing knowledge, Bertelsen et al. developed simulated learning exercises for medical students  
87 specifically focused on cross cultural sensitivity.(12) They found that simulations provided  
88 students a controlled, safe environment to practice culturally sensitive communication alongside  
89 medical skills. Similarly, Mohamed-Ahmed found simulations with medical students were  
90 successful in “helping tomorrow’s doctors develop insight into global health challenges and may  
91 produce more rounded clinicians capable of caring for more culturally diverse populations.”(13)

92 The use of simulations in political science/IR, humanitarian relief, and medical training  
93 suggests pedagogical value to interdisciplinary global health classes, however there are limited  
94 examples of this in existing literature. In one of the few published studies, Kahlid et al. created a  
95 simulation of a World Health Assembly of the World Health Organization (WHO) and found the  
96 simulation bolstered students’ research capabilities, critical analysis, time management, and  
97 organizational effectiveness.(14) Students also reported improvements in effective interpersonal  
98 communication, public speaking, networking, and solution-driven dialogues. The instructors  
99 found that the simulation provided an enhanced understanding of complex issues, which filled  
100 existing knowledge gaps more effectively than traditional teaching approaches. They concluded  
101 that “simulation-based experiential learning stands out as a transformative educational  
102 approach . . . However, a knowledge gap exists in how to effectively develop and implement  
103 these simulations.”(14) Loutet et al. developed a range of global health simulations to improve  
104 education across the fields of medicine, policy making, and social advocacy, noting “further  
105 research is required to assess the long-term educational impact of simulations in global  
106 health.”(8) This article aims to contribute to filling the gap in documenting and analyzing serious  
107 games as a pedagogical approach for global health classes.

108

## 109 **The Simulation: Accord**

110 The simulation, titled Accord, from which data was collected and analysed, was facilitated for a  
111 Global Health and International Affairs course designed to introduce Master of Public Health  
112 (MPH) students to scholarship, policymaking and practice at the intersection of global health  
113 and international affairs (full game materials are available from the corresponding author on  
114 request). The course learning outcomes included for students to develop familiarity with key  
115 concepts and debates in global health governance scholarship and practice, and then apply this  
116 knowledge to critically analyze selected global health issues and policy responses. The course  
117 aimed to integrate decolonizing approaches, including through a syllabus which incorporated  
118 diverse scholars and worldviews; an emphasis on student-led learning and activities; and  
119 persistent, explicit, and critical engagement with the colonial context within which the university  
120 is situated. Different topics were examined throughout the course, including global health  
121 institutions, pandemic response, and the political economy of global health. In particular, the  
122 class discussed the negotiations processes for revisions to the International Health Regulations  
123 and the proposed pandemic agreement, which was being negotiated by WHO member states  
124 throughout the duration of the course (September to December 2023).

125 The simulation was facilitated on the final day of class. Students were grouped into  
126 country teams tasked with negotiating a pandemic treaty, following a COVID-like pandemic in  
127 the fictional world of Zecan (figure 1). Using this fictional setting of Zecan, as opposed to  
128 existing states, removed pressure to ensure realism and prevented participants from becoming  
129 distracted by real world events, perceptions, or ideas. Fictional settings reduce bias, making it  
130 easier for participants to step into unfamiliar roles.(15) The goal was to create a familiar world  
131 unencumbered by the histories and other assumptions we bring to 'real world' engagements.  
132 Zecan comprises two high-income (HICs), two-middle income (MICs), and two low-income  
133 (LICs) countries. These differences were operationalised in the simulation through different

134 allocations of Political Resource Points (PRP). PRP represented income and international  
135 influence, and initial allocations ranged from two (for LICs) to six (for HICs). These countries  
136 also differed in political systems (from parliamentary democracies to one party authoritarian  
137 states), and public health capabilities (from strong public systems to under resourced,  
138 fragmented systems).

139

140 Figure 1: Fictional World of Zecan

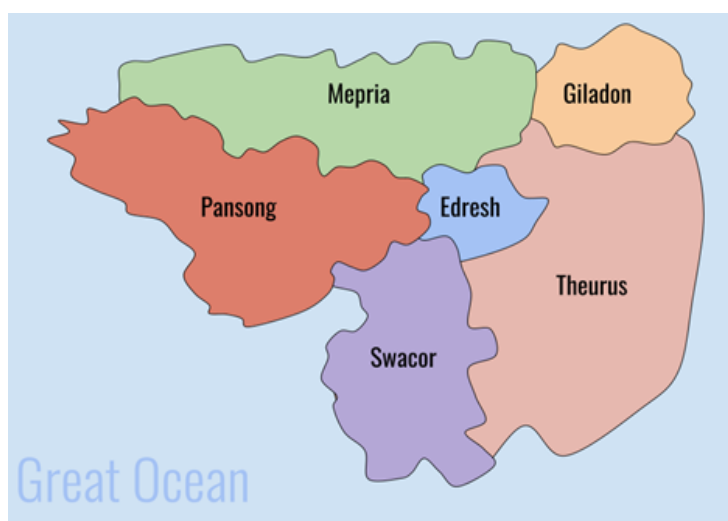

141

142 The learning objectives of Accord were to: apply learning from past health crisis and  
143 global health governance efforts; actively engage with key concepts around global health and  
144 international affairs; experience strategies and challenges related to global health cooperation.  
145 The simulation was designed as a cooperative game with the overall aim to negotiate a global  
146 pandemic treaty that at least five of the six country teams agree to adopt. Individual teams could  
147 also earn PRPs throughout the simulation by having articles accepted into the treaty and/or  
148 trading them in exchange for support for specific articles. The country that earned the most  
149 points by the end of the game would be the 'winner among winners' – but only if negotiations  
150 successfully resulted in the adoption of a treaty. If the treaty was not agreed to, all teams would  
151 lose, regardless of PRPs earned. This structure aimed to demonstrate both the collective gains

152 of co-operation, as well as the challenges of actualizing them in a diverse context of self-  
153 interested actors.

154 The MPH class involved was small, with just six students, so five additional graduate  
155 students/research fellows were recruited to participate in the simulation. All participants were  
156 grouped into six teams of two (with two of the authors forming a team) representing the six  
157 countries in Zecan. The third author and instructor filled the facilitating role of the Global Health  
158 Organization (GHO), which had a similar mandate to WHO. Country teams were provided with  
159 background information on the characteristics of each state as well as on their state's priorities  
160 for the treaty and relationships with other states. Prior to the simulation, teams prepared text for  
161 three draft articles they wished to be included in the treaty, based on assigned state contexts.  
162 The simulation consisted of three rounds (see Figure 2 for game process). At the beginning of  
163 each round, every country introduced one of their draft articles for inclusion in the treaty,  
164 explained why it should be included, and answered queries from the other country teams.  
165 Following the presentation of draft articles, all teams were provided access to the text of the  
166 proposed articles on a shared online document. There was then a period of negotiation where  
167 teams could try to solicit support for their proposed article, influence changes in others' articles,  
168 and/or find allies to combine similar articles. During negotiation periods, teams sought to  
169 influence each other through logical arguments and appealing to shared interests, as well as by  
170 trading PRPs in exchange for support. Following each round of negotiation a vote was  
171 conducted on revised articles to determine whether each article was to be included or not.  
172 Articles with support from at least four countries (i.e. four 'yes' votes) remained in the draft  
173 treaty, with sponsoring state(s) earning one PRP each. Articles which did not receive four 'yes'  
174 votes were discarded. This process was repeated three times.

175 The simulation also included 'chaos players.' Chaos players are used in serious games to  
176 inject a realistic element of the unexpected. During one round, the chaos player was a civil



177 society organization concerned about data security, and expressing fear that global surveillance  
178 systems would threaten individual privacy. In another round, the chaos player was a  
179 multinational pharmaceutical company with access to many PRPs that could be exchanged with  
180 countries for alignment with sectoral interests, for example in protecting intellectual property  
181 regulations and preventing development of generic medical products, such as vaccines. In the  
182 third round, the chaos player was a healthcare workers' union advocating for greater protections  
183 for healthcare workers. The purpose of introducing varying chaos players was to demonstrate  
184 the complex and divergent interests and influence of non-state actors in global health  
185 governance.

186         Once the three rounds of negotiations were complete, all the articles that had received at  
187 least four votes were combined into a full draft treaty. A final vote was then held across all  
188 country teams, on whether to adopt the pandemic treaty. Voting 'yes' cost two PRPs, but if the  
189 treaty was successfully adopted, all teams, regardless of if/how they voted, would earn three  
190 PRPs. This, again, was in effort to simulate the costs and benefits of collective action, as well as  
191 the potential for free riding. This learning was further buttressed by the structure wherein it was  
192 possible that the final draft included articles that teams may not have supported during earlier  
193 rounds of negotiations because only four 'yes' votes were initially required for article inclusion.  
194 Since five 'yes' votes were needed for the whole treaty to pass, teams were potentially faced  
195 with the choice of approving a treaty they mostly agreed to or rejecting the whole thing. In this  
196 instance, only three states (i.e. student teams) voted 'yes' to adopting the final draft of the treaty  
197 and so the pandemic treaty was not agreed to or adopted, and thus, all teams lost.

198

199

200

201

202

203

Figure 2: Flow chart of game process

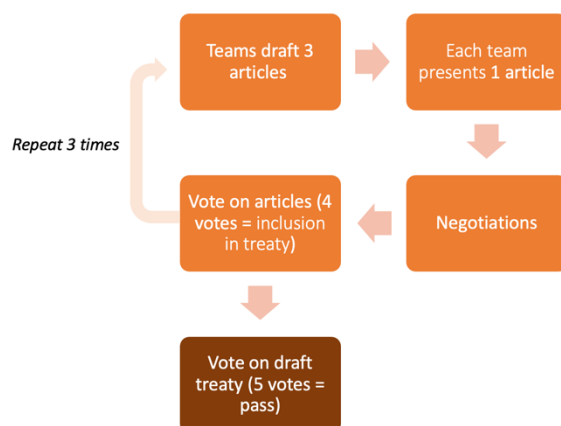

204

205 Following the final vote on the treaty, students participated in a facilitated discussion and  
206 debrief. They were then assigned individually to write a reflective essay about the simulation,  
207 integrating insights and knowledge from at least seven course syllabus items (i.e. readings,  
208 lectures and student presentations). As multiple articles on serious games note, reflection and  
209 discussion after the simulation are crucial components to the learning success of a simulation.  
210 (5) Reflective essays are frequently used to internalize learnings from serious games as they  
211 enable participants to link their experiences in the simulation to the theories and approaches  
212 studied.

213

## 214 **METHODS AND MATERIALS**

215 Classroom simulations are often evaluated using pre- and post- surveys to identify growth in  
216 learning around specific concepts and overall impressions. However, Starkey and Black note  
217 that, "The strength of simulations lies not primarily with improvements of the theoretical  
218 vocabulary and understanding, but with improvements of critical thinking and moral reasoning.  
219 The problem with that type of learning is that it is exceedingly difficult to capture in surveys."(16)  
220 Noting this limitation as well as our small class/sample size, we opted to use a combination of

221 participant observation and thematic analysis of student assignments to explore whether and  
222 what learning outcomes had been achieved through the simulation. Ethics approval was sought  
223 from the university ethics board (REB #30002137). Students completed written informed  
224 consent forms, which were kept anonymous from the course instructor to ensure academic  
225 evaluations were independent from consent. Consent was sought for authors to act as  
226 participant observers and, after having received their final marks, for student reflective essays to  
227 be analyzed and quoted anonymously. Students could opt into either or both parts of the study  
228 (observation and/or thematic analysis) and were informed prior to the simulation that their  
229 consent to participate (or not) would have no bearing on their course grading. All students  
230 consented to participant observation and five of the six students consented that their  
231 assignments could be analysed and included.

232 As noted, the authors (the lecturer, teaching assistant, and guest lecturer) acted as  
233 participant observers, with one filling the role of GHO and the others participating in a country  
234 team. The authors took notes during the simulation and discussed observations following it. The  
235 five student assignments were analyzed using a reflexive thematic analysis approach. Codes  
236 were developed both deductively and inductively, being read with the simulation learning  
237 objectives in mind but also identifying further codes based on the data. Codes were grouped  
238 into themes, with one author conducting the thematic analysis of the assignments and then  
239 sharing the analysis with the others for discussion. The authors also consulted their individual  
240 notes as participant observers, triangulating these with the findings of the student assignments.

241

| Table 1: Thematic framework            |                          |
|----------------------------------------|--------------------------|
| <b>Learning Objective Themes</b>       | <b>Additional themes</b> |
| Apply learning from past health crisis | Moral dilemmas           |
| Actively engage with key concepts      | Decolonizing learning    |

|                                                                   |  |
|-------------------------------------------------------------------|--|
| To experience global health cooperation strategies and challenges |  |
|-------------------------------------------------------------------|--|

242

243

## 244 **RESULTS**

### 245 **Learning Objectives: apply learning from past health crises**

246 Throughout the term students had engaged with several case studies of health crises through  
247 readings, discussions, and in-class activities. They were asked to draw on learnings from these  
248 cases when preparing for, engaging in, and reflecting on the Accord simulation. The application  
249 of this learning was evident throughout different aspects of the serious game; students  
250 referenced specific cases to strengthen their arguments and negotiating positions, in presenting  
251 their articles and when explaining their learning in their reflective essays. Reflecting on the utility  
252 of the proposed pandemic treaty they and their colleagues had created, several students  
253 referred to different course case studies. For example, when discussing a proposed article on  
254 vaccine access one student wrote,

255           “With COVAX, although the intention was to have equitable vaccine  
256           distribution, this was not the case because countries who said they  
257           would donate a certain number of vaccines ended up donating less.

258           Without some sort of authority figure to issue penalties to ensure  
259           states comply to the terms of the pandemic treaty, it may render  
260           useless if nations do not play their part.” (Student 2)

261

262 Another student reflected on how the treaty would be actualized, noting past  
263 challenges in implementing global health responses.

264           “One of our readings discussed how during the polio outbreak in  
265           Syria, due to the WHO’s position of not interfering with state

266 sovereignty, the WHO did not react and implement programs in rebel-  
267 controlled areas. This was briefly touched upon in Article 4.2 [of the  
268 proposed treaty] which calls for an allocation of resources and  
269 collaboration with humanitarian organizations in regions affected by  
270 conflict. Based on the insights from Syria, how would our article work  
271 when governments refuse to cooperate and what position would the  
272 GHO be expected to take considering the consequences of the WHO  
273 refusing to do anything against the wishes of the Syrian  
274 government?" (Student 1)

275  
276 Reflections also moved beyond diagnosing the problems in past crisis response to  
277 conceptualizing solutions. A student reflected,

278 "Thinking back on the Ebola outbreak in West Africa, the lack of  
279 infrastructure, health care workers, technologies and other resources  
280 needed for a strong health care system resulted in many cases and  
281 deaths. However, the drafted treaty acknowledges these, and I  
282 believe will help mitigate future pandemics by building on LICs  
283 capacity, therefore, alleviating the pandemic burden on a global  
284 scale." (Student 2).

285 Another student commented on an article their team had included around health delivery during  
286 conflict,

287 "The inclusion of this article addresses the inaction that has occurred  
288 by leading global health actors respecting the authority of de jure  
289 governments in areas of contested sovereignty during previous health  
290 emergencies such as the 2013 Syrian polio. Incorporating global  
291 health partnerships allows for the treaty to be enacted in regions

292 outside of member state jurisdiction, ensuring conflict-affected areas

293 are not neglected during future pandemics.” (Student 4)

294 Students applied learnings from case studies to illustrate key concepts, support their arguments

295 and construct solutions to overcome past challenges.

296

### 297 **Learning Objectives: actively engage with key concepts**

298 The course curriculum included a focus on key global health governance concepts including the

299 securitization of health, intersectional and transnational feminism, political economy, and the

300 commercial determinants of health. As health sciences graduate students, much of this content

301 was new to the class. The simulation provided opportunities to actively engage with and

302 internalize these learnings. For example, one student wrote:

303 “The chaos actors reminded me of our reading on the five vehicles of

304 power that corporations and civil society use to impact global health

305 decisions. In our case, the union was using the political environmental

306 vehicle by lobbying, or corporate influence on decision-making

307 through exclusive access to policy makers. I was reminded of the

308 enormous power of non-state actors within global health governance.”

309 (Student 4)

310 Another student similarly reflected on “an example of how the treaty is shaped by politics. There

311 is this claim and understanding of global health needs a united effort to overcoming global

312 disease but there is a lack of initiative for accountability and responsibility.” (Student 1)

313 Many students raised the concept of global health as a public good and discussed

314 contradictions between this ideal and the self-interest of states. One student wrote, “The article

315 proposed in the draft treaty did see vaccines and disease eradication as a necessary public

316 good . . . . [but] the limitations of the article accepted in the course pandemic treaty for Zecan

317 were evident, as it offered a temporary three-year agreement with terms that primarily favored

318 high-income countries like my nation, Swacor.” (Student 5) Similarly, another student wrote,  
319 “There was a recognition of vaccines as global public goods but debate surrounding who pays  
320 for and has authority over them.” (Student 3)

321 Other students applied feminist analysis to evaluate the treaty negotiation process.

322 “This component of the proposed pandemic treaty also highlighted  
323 course concepts which discussed how women, including those in  
324 working positions, are often differentially impacted from pandemic  
325 impacts. This is further highlighted in the course readings which  
326 discuss how women are seldom considered in the responses to  
327 global health emergencies, leading to long-term health and economic  
328 effects.” (Student 5)

329 And

330 “[Course readings] demonstrated the ways women have been  
331 disproportionately impacted by disease outbreaks including the Ebola  
332 and Zika viruses, urging the need to address gender inequality and  
333 discrimination in emergency responses. . . . Despite this significant  
334 challenge, gender is only mentioned in Article 4.3 on healthcare  
335 workforce strengthening. Although this article mentions the need for  
336 gender equality in the healthcare workforce and its incorporation in  
337 related policies, it is in accordance with state laws and norms which  
338 leaves little room for change and progress in addressing the  
339 underlying issue.” (Student 3)

340 Students applied feminist principals to both construct their articles, and also to critique the final  
341 treaty which they recognized as falling short on gender equality goals.

342

343 **Learning Objectives: to experience global health cooperation strategies and challenges**

344 The simulated negotiation process also provided opportunities for students to experience the  
345 practical challenges of global health cooperation. Many commented on time constraints:  
346 “During the two-and-a-half-hour negotiation process, I had to cut conversations short because I  
347 would need to engage in a conversation with a different party. It was overwhelming which made  
348 me think about what the actual negotiation process would be like with 188 more countries.”

349 (Student 1) The facilitator often had to urge students to complete negotiations and make  
350 decisions, as they had to manage both in team discussions and conversations with other states,  
351 testing their collaborative working and communications skills. One student wrote,

352 “Engaging collaboratively with my partner and participating in  
353 negotiations with other teams provided me with valuable insights into  
354 the complex and intricate strategies that are critical in effective  
355 negotiation grounded in respect and mutual benefit. This challenged  
356 my thinking as I began to understand the difficulty and need to  
357 balance competing interests that exist between global health and  
358 international relations. (Student 3)

359  
360 Numerous students commented on the challenge of reconciling domestic priorities with  
361 overall global health goals:

362 “This simulation showed me the difficulty of making connections and  
363 fostering collaboration when there are varying values. For example,  
364 during the last negotiation period, the three groups my team wished  
365 to discuss with were occupied deliberating intellectual property, while  
366 our focus was on surveillance. We tried to ask if we could speak to  
367 one representative from each country but the responses we got were,  
368 “We already have a surveillance system” or “This IP discussion is  
369 more important”. (Student 2)



370 Others noted how different perspectives on equity concerns limited meaningful action.

371 “The difficulty of adopting gender transformative approaches due to  
372 the politics that often surround gendered health issues was apparent  
373 throughout the simulation . . . one country preferred gender-blind  
374 approaches to global health governance that refrained from  
375 highlighting gender inequalities within health emergencies. . . This  
376 disagreement around gender inequality during the simulation further  
377 illustrated the complexity of global health governance, as domestic  
378 politics transcend borders to influence global decisions.” (Student 4)

379 Further reflection of the constraint of domestic policies on global processes from a country team  
380 with long standing international conflicts included, for example, that: “Representing Mepria in  
381 the pandemic treaty simulation, I began to recognize the complex relationships between local  
382 political climates and global health need . . . Additionally, as politics impacted our ability to form  
383 alliances or even negotiate with some nations, the collective global health need was often  
384 ignored, which was reflected in the draft treaty.” (Student 3) Experiencing both practical and  
385 political constraints to negotiations, led to considerations of why the global health ideals  
386 expressed in international fora are so difficult to operationalize in practice.

387

### 388 **Additional outcomes: experiencing in moral dilemmas**

389 The above learnings in turn led many students to experience and reflect on moral dilemmas  
390 arising from their efforts to reconcile their interests in negotiating an effective and equitable  
391 pandemic treaty and their material or political self-interests as diverse countries. For example,  
392 one student wrote:

393 “Discussions within my country team were geared towards  
394 maintaining our PRPs and monetary and trade success and keeping  
395 our citizens at ease during the pandemic and future pandemic treaty.

396 It was challenging to understand global health and equity-based  
397 pandemic principles yet create selfish articles which would serve to  
398 benefit only high-income countries.” (Student 5)

399 Many students noted they became distracted by wanting to earn or save PRPs: “Although the  
400 concept of points made it fun it was at times distracting because I found myself worrying about  
401 the points rather than what my country would do.” (Student 1)

402 The role of Big Pharma, as a chaos player who could give away PRPs, also led to moral  
403 conflicts,

404 “I think one concept that stood out the most during the negotiation  
405 process was how much politics and corporations were involved. We  
406 all went into negotiations wanting the best for our nations and not the  
407 world as a whole. For example, my country was a large manufacturer  
408 of vaccines and we found ourselves trying to please the  
409 pharmaceutical company more than we did the LMICs because there  
410 was a possibility of us getting points.” (Student 1)

411 And

412 It [taking PRPs from Big Pharma] was a morally conflicting  
413 experience; despite recognizing what was happening and knowing it  
414 was better to turn away, we became the victims of corporate power  
415 for financial incentive. It was surprising because I wanted to be a  
416 responsible public health professional, capable of refusing  
417 corporations and leading the many initiatives to halt their influence.  
418 Instead, I surrendered to secure the financial assistance my country  
419 needed. This experience revealed that even with the right moral  
420 principles, when confronted with adversity or, in this case, you lack

421 the resources for your nation, circumstances may lead you to take  
422 actions contrary to your moral compass.” (Student 2)

423  
424 Other students noted that moral dilemmas were created by power structures that  
425 challenged ideals of democratic or fair global governance: “I assumed that, as everyone  
426 ultimately gets one vote, we would all have similar power during negotiations. However, with the  
427 lowest PRPs, we had limited resources to leverage for support. My teammate and I found  
428 ourselves compromising key values to build and maintain relationships.” (Student 4) Similarly, a  
429 student wrote, “Because we were a low-income country with limited resources and only two  
430 PRPs, we were very cautious in selecting our article topics and parameters. We tried to  
431 articulate them to meet our dire country’s needs but also phrased the articles in a way that  
432 would appeal to middle- and high-income countries to get their vote. I found this process to be  
433 quite difficult.” (Student 2)

434 These comments, as well as discussions at the end of class revealed that students did  
435 not always behave as they had expected to during the simulation. Even though co-operation  
436 was essential to success, many noted with surprise how the concept of winning diverted the  
437 priorities they had set prior to the simulation. Participant observers also noted how focused on  
438 PRPs teams became, despite the game structure demanding co-operation, with this reflecting  
439 both a desire to ‘win’ the game and to do what was perceived as best for their country/team,  
440 which could be in conflict with global cooperation goals.

441  
442 **Additional outcomes: critical reflections on decolonizing health**

443 Experiencing the moral dilemmas described above, as well as the power relationships inherent  
444 to negotiation processes led to critical reflections around decolonizing global health – a topic  
445 that was frequently discussed throughout the course, but which was not explicitly incorporated  
446 into instructions for this activity and assignment. One student wrote,

447 “The power relationships that were on display reminded me of our  
448 conversations around decolonization and this need to acknowledge  
449 the colonial context underpinning global health. Reflecting on the  
450 simulation, many articles focused on the conventional definition of  
451 global health as public health elsewhere. Unknowingly, a room full of  
452 professionals committed to decolonization centred discussions  
453 around a philanthropic and neocolonial understanding of global health  
454 governance that focused on elevating LMICs to the standards of  
455 HICs.” (Student 3)

456  
457 Students recognized that the treaty articles reinforced the colonial structures of global health.

458 “The treaty also does not address one of the major challenges  
459 discussed heavily in class which is decolonizing global health. This  
460 was predominantly evident in the technology transfer article where it  
461 is still very much seen as HICs being charitable to LMICs . . . I feel  
462 like this creates a feedback loop of LMICs still having to rely on these  
463 HICs because the capacity-building onus is placed on LMICs and the  
464 technology transfer support from HICs comes too late in the  
465 prevention stage. As discussed in our course, decolonizing global  
466 health emphasizes for equitable, inclusive and just public health that  
467 lacks supremacy.” (Student 1)

468 Others noted a double standard in how responsibility was positioned in the treaty articles: “upon  
469 review of the articles, there are a lot of parameters regarding how the LMICs need to be  
470 supported but there is a lack of parameters regarding what the role of HICs is.” (Student 1)

471 Another student similarly wrote, “While the simulated treaty proposed during the activity  
472 effectively addressed numerous global health challenges, prioritizing low- and middle-income

473 countries, I observed a notable oversight in capturing the influence of high-income countries in  
474 treaty negotiations.” (Student 5)

475           Some students pointed out how specific issues were neglected due to a focus on  
476 “traditional/colonial priorities,” writing “an element that was missing in the treaty was  
477 acknowledging Indigenous ways of knowing and ensuring the safety of Indigenous  
478 people.”(Student 2) Another student noted,

479           “While Articles 4.2 and 4.3 mention traditional health providers and  
480 gender considerations, these concepts are relatively underdeveloped.  
481 Most articles centre around Western views of health and perpetuate  
482 the conspicuous invisibility of women despite the acknowledgement  
483 of the role of women as caregivers. Addressing gender  
484 considerations and Indigenous health practices in separate articles  
485 could ensure these concepts are prioritized and facilitate dialogue  
486 around the historical, colonial, and political contexts that underlie  
487 inequities.” (Student 4)

488 Similar to their experiences of unanticipated moral dilemmas, students were disappointed they  
489 had not taken a more decolonial approach to the treaty negotiations. However, they also  
490 identified how the structure of the negotiations and pre-existing power dynamics limited their  
491 ability to do so. One student commented during the end of class discussion that they now  
492 understood the decisions their home country (a LMIC) took in international fora better, as they  
493 had experienced the limitations of imposed on LMIC. Despite awareness of calls to decolonize  
494 global health, students were limited in their ability to achieve this ideal by the very structures  
495 they would have liked to dismantle.

496

497 **DISCUSSION**

498 Serious games have been used in other disciplines to foster deep learning and critical thinking  
499 while building collaboration and communications skills. Our experience employing a simulation  
500 of a global health treaty negotiation demonstrated similar potential for global health courses.  
501 Indeed, simulations may be particularly apt tools for interdisciplinary domains such as global  
502 health, as they enable to students to engage with different sets of knowledge at once and  
503 explore unfamiliar concepts. In this case, students who had limited prior knowledge of IR and  
504 related disciplines, demonstrated valuable learning, in particularly on the importance and  
505 influence of political economic interests in global health governance.

506 Fabricatore et al. note that serious games may be particularly apt for learnings around  
507 how to manage wicked problem, as they engage players in collective activities that require the  
508 continuous interpretation of changing circumstances.(1) Global health is characterised by  
509 multiple wicked problems; enabling students to engage with those related to a pandemic  
510 response provided an opportunity to practice drawing on multiple perspectives and test various  
511 approaches. Students also drew on past case studies to develop ideas on how to overcome  
512 persistent challenges in global health, suggesting an advancement of their critical thinking skills  
513 beyond problem diagnosis to response construction. This ability to learn from past cases is a  
514 skill that has wide applicability for global health students as they move on to careers where they  
515 will be required to design or develop health interventions and/or policy.

516 Simulations are often used in both military and medical fields because they enable  
517 learners to test new approaches and ideas in a safe-to-fail environment. In this case, all the  
518 teams did indeed 'fail' at the game as they could not achieve agreement on the treaty. Students  
519 were particularly dismayed by their inability to overcome self-interest to achieve a global  
520 pandemic treaty, and by the lack of equity and decolonizing considerations in the draft treaty.  
521 However, it is these 'failures' that provided opportunities for deep learning and critical reflection  
522 as students questioned what constrained their underlying motivations and actions. The tensions  
523 between the ideals often taught in global health classes – such as those related to gender

524 equality – and the challenges of implementing them in global health processes were directly  
525 experienced. The simulation also required students to grapple with how such ideals are  
526 constrained by persistent power relationships including colonialism.

527         Khalid wrote that simulations can prompt students to navigate and respect different  
528 cultural contexts, which in turn prepares them for handling sensitive issues.(14) We found that  
529 the fictional world of Zecan put students in roles they were uncomfortable and unfamiliar with,  
530 prompting them to view the challenge of pandemic response from alternative perspectives. This  
531 act of being placed in someone else’s shoes generated both empathy towards those tasked with  
532 decision-making and humility around their own assumptions about what good global health  
533 governance entails.

534         This in turn fed into critical reflections around decolonizing global health. There is a  
535 growing literature on how to translate calls to decolonize global health into global health  
536 teaching. Banerjee et al. have challenged global health instructors with the question, “are we  
537 training students to be “white saviours”, irrespective of their ethnicity or country of origin, and  
538 how can global health education be reconfigured?”(17) These questions, and broader  
539 movements to dismantle the White Industrial Saviour Complex and global hierarchies in  
540 education are complex, and by no means do we suggest serious games/simulations are the  
541 simple answer to these challenges. Nevertheless, we are encouraged by that the critical  
542 reflections on this simulation included recognition of the ongoing harms of colonial structures  
543 and dominant priorities. Critical pedagogies demonstrate how exposing contradictions can  
544 reduce the power of hegemonic ideas, and through this simulation students experienced the  
545 contradictions of a global health system that espouses equity but is buttressed by systems of  
546 colonization, including the power of multinational co-operations. Students noted the differences  
547 in how low-income and high-income countries were presented in articles, which topics were  
548 prioritized, and how, despite a one-member-one-vote system, some had much greater power  
549 than others. Though such learning can be achieved through other means, by actively

550 experiencing these dynamics through the simulation, student learning and critical reflection was  
551 deepened and internalised through the moral conflicts which arose.

552 Our analysis is limited by the small class/sample size, and as a result, we had exclusive  
553 reliance on qualitative methods. Evidence and knowledge generated from such simulations  
554 could be bolstered, for example, through quantitative analysis of pre and post simulation  
555 surveys to determine differences in knowledge. However, this is the third time we have used the  
556 simulation in a class and findings are congruent with what has been previously observed,  
557 though not documented. In an effort to mitigate these limitations, a combination of participant  
558 observation and an analysis of reflective essays enabled in-depth analysis of both intended and  
559 unintended learning outcomes.

560

## 561 **CONCLUSION**

562 The Accord simulation effectively achieved its learning outcomes, in addition to fostering deep  
563 learning and critical thinking among the student participants. The in-class activity and  
564 discussions demanded students put their learning into practice, while the final essays prompted  
565 reflection. Equally important, all participants expressed that they enjoyed the activity and would  
566 recommend it to others. There appears to be great potential to apply serious games to global  
567 health learning, particularly where such activities foster critical reflection on, and tools for  
568 decolonizing global health knowledge and teaching.

569

570

## 571 **References**

- 572 .1. Fabricatore C, Gyaurov D, Lopez X. Rethinking Serious Games Design in the Age of  
573 COVID-19: Setting the Focus on Wicked Problems. In: Ma M, Fletcher B, Göbel S, Baalsrud  
574 Hauge J, Marsh T, editors. *Serious Games*. Cham: Springer International Publishing; 2020.  
575 p. 243–59.
- 576 2. Asal V, Blake EL. Creating Simulations for Political Science Education. *J Polit Sci Educ*.  
577 2006 Jan 1;2(1):1–18.



- 578 3. Engel S, Pallas J, Lambert S. Model United Nations and Deep Learning: Theoretical and  
579 Professional Learning. *J Polit Sci Educ*. 2017 Apr 3;13(2):171–84.
- 580 4. Hammond A, Albert CD. Learning by Experiencing: Improving Student Learning Through a  
581 Model United Nations Simulation. *J Polit Sci Educ*. 2020 1;16(4):441–58.
- 582 5. Asal V. Playing Games with International Relations. *Int Stud Perspect*. 2005 1;6(3):359–73.
- 583 6. Horn L, Rubin O, Schouenborg L. Undead Pedagogy: How a Zombie Simulation Can  
584 Contribute to Teaching International Relations 1. *Int Stud Perspect*. 2016 1;17(2):187–201.
- 585 7. Simpson AW, Kaussler B. IR Teaching Reloaded: Using Films and Simulations in the  
586 Teaching of International Relations. *Int Stud Perspect*. 2009 1;10(4):413–27.
- 587 8. Loutet MG, Zhang J, Varsaneux O, Ferguson A, Hulme J, Stone S, et al. Using Experiential  
588 Simulation-Based Learning to Increase Engagement in Global Health Education: an  
589 Evaluation of Self-reported Participant Experience. *Med Sci Educ*. 2020 1;30(3):1245–53.
- 590 9. Newmann WW, Twigg JL. Active Engagement of the Intro IR Student: A Simulation  
591 Approach. *PS Polit Sci Amp Polit*. 2000 1;33(4):835–835.
- 592 10. Krain M, Shadle CJ. Starving for Knowledge: An Active Learning Approach to Teaching  
593 About World Hunger. *Int Stud Perspect*. 2006 Feb 1;7(1):51–66.
- 594 11. Kesler S, James E, Scheller A, Gray S, Kne L, Hendel-Paterson B. Simulation as a  
595 Teaching Method: Evaluation of the University of Minnesota Humanitarian Crisis Simulation.  
596 *Disaster Med Public Health Prep*. 2023 17:e121.
- 597 12. Bertelsen NS, DallaPiazza M, Hopkins MA, Ogedegbe G. Teaching global health with  
598 simulations and case discussions in a medical student selective. *Glob Health*. 2015  
599 4;11(1):28.
- 600 13. Mohamed-Ahmed R, Daniels A, Goodall J, O’Kelly E, Fisher J. ‘Disaster day’: global health  
601 simulation teaching. *Clin Teach*. 2016;13(1):18–22.
- 602 14. Khalid AF, George MA, Eggen C, Sriharan A, Wali F, Viens AM. Using Simulation-Based  
603 Experiential Learning to Increase Students’ Ability to Analyze Increasingly Complex Global  
604 Health Challenges: A Mixed Methods Study 2023 Available from:  
605 <https://www.medrxiv.org/content/10.1101/2023.12.19.23300262v1>
- 606 15. Naul E, Liu M. Why Story Matters: A Review of Narrative in Serious Games. *J Educ Comput  
607 Res*. 2020 1;58(3):687–707.
- 608 16. Simulation in International Relations Education - Brigid A. Starkey, Elizabeth L. Blake, 2001  
609 Available from: <https://journals.sagepub.com/doi/10.1177/104687810103200409>
- 610 17. Banerjee AT, Bandara S, Senga J, González-Domínguez N, Pai M. Are we training our  
611 students to be white saviors in global health? *The Lancet*. 2023 Aug 12;402(10401):520–1.

612

613 **Acknowledgements:** we are grateful to the students and colleagues who participated in the  
614 simulation and shared their insight with us, in particular, those who voluntarily participated  
615 including Haaris Tiwana, Alexandra Selinger, Lara Hollman, and Alice Murage  
616  
617  
618  
619
